# Supplementary material for: An extremely rich repertoire of bursting patterns during the development of cortical cultures
Source: Springer Nature journal article supplement (doi:10.1186/1471-2202-7-11), 2006-02-07

**A**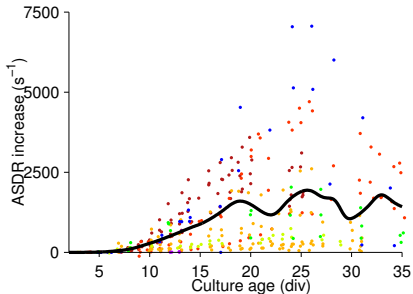**B**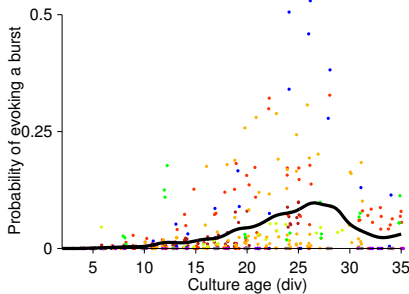

Supplement: 12868_2005_216_MOESM8_ESM.pdf [file 12868_2005_216_MOESM8_ESM.pdf]
